# Supplementary figures and images for: Mitochondrial reactive oxygen species trigger metformin-dependent antitumor immunity via activation of Nrf2/mTORC1/p62 axis in tumor-infiltrating CD8T lymphocytes
Source: HighWire-hosted journal article supplement (doi:10.1136/jitc-2021-002954), 2021-09-01

**A MO5**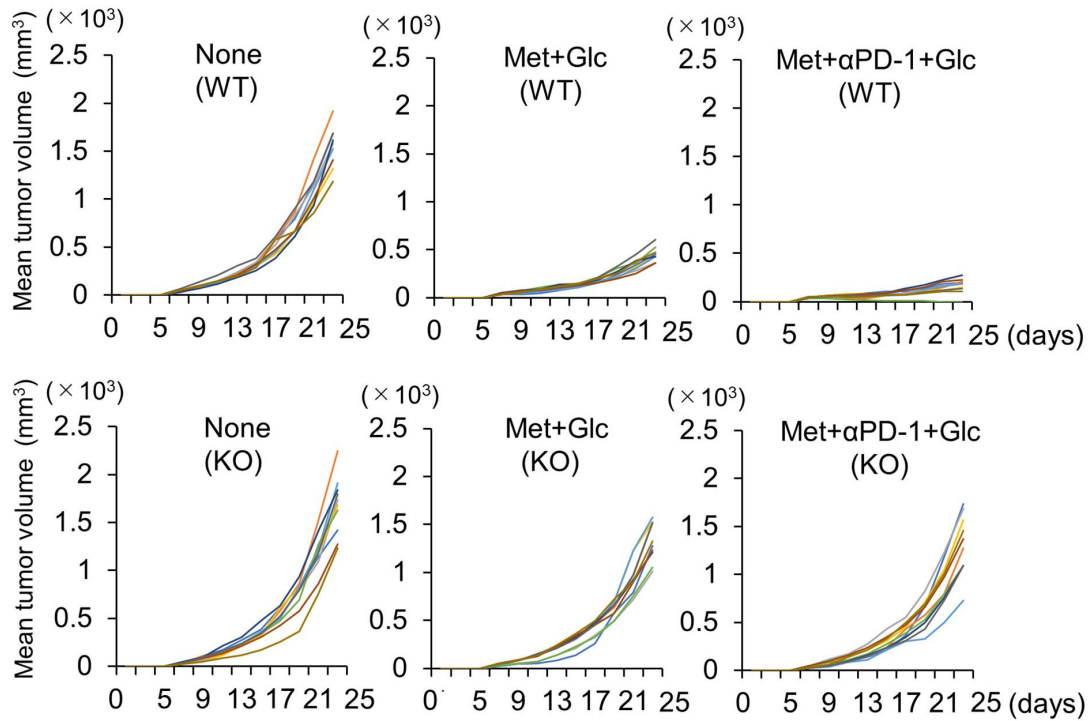**B MO5**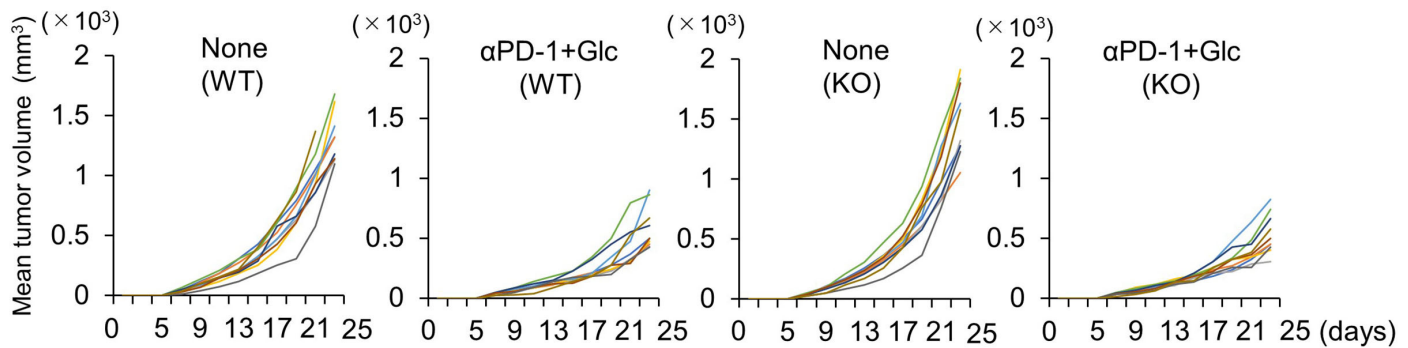

Supplement: jitc-2021-002954supp008_data_supplement.pdf [file jitc-2021-002954supp008_data_supplement.pdf]
